# Supplementary material for: Molecular-layer-deposited tincone: a new hybrid organic–inorganic anode material for three-dimensional microbatteries
Source: Royal Society of Chemistry journal article supplement (doi:10.1039/d0cc03869e), 2020-01-01
Supplement: d0cc03869e1.pdf [file d0cc03869e1.pdf]

## Electronic Supplementary Information (ESI)

### Molecular-Layer-Deposited Tincone: a New Hybrid Organic-Inorganic Anode Material for Three-Dimensional Microbatteries

Hongzheng Zhu,<sup>a</sup> Mohammad Hossein Aboonasr Shiraz,<sup>a</sup> Lu Yao,<sup>b</sup> Keegan Adair,<sup>b</sup> Zhiqiang Wang,<sup>b</sup> Huan Tong,<sup>c</sup> Xueyang Song,<sup>a</sup> Tsun-Kong Sham,<sup>b</sup> Mohammad Arjmand,<sup>a</sup> Xiping Song,<sup>c</sup> and Jian Liu<sup>a\*</sup>

<sup>a</sup> *School of Engineering, Faculty of Applied Science, University of British Columbia, Kelowna, BC V1V 1V7 Canada*

<sup>b</sup> *Department of Chemistry, University of Western Ontario, London, ON, N6A 5B7 Canada*

<sup>c</sup> *State Key Laboratory for Advanced Metals and Materials, University of Science and Technology Beijing, Beijing 100083, PR China*

\* Corresponding author: [Jian.liu@ubc.ca](mailto:Jian.liu@ubc.ca) (J. Liu)

## Experimental

### *Deposition of tincone by MLD*

The deposition of tincone by MLD was performed at 100 °C in a commercial ALD system (GEMStar™ XT Atomic Layer Deposition System, Arradance, USA) using (tetrakis(dimethylamino)tin (IV), (TDMASn, Strem Chemicals) and Glycerol (GL, Sigma Aldrich) as the precursors. The deposition temperature (100 °C) was chosen based on the MLD window (75-200 °C) for tincone from TDMASn and GL reported previously [1]. The source temperature for both TDMASn and GL was 60 °C. The precursor pipeline was maintained at 100 °C to avoid precursor condensation. Nitrogen gas (99.999%) was used as the carrier gas at a flow rate of 20 sccm. The base pressure in the ALD reactor was sustained at 200 mTorr. The MLD procedure was set as follows: (1) a 0.5 s supply of TDMASn; (2) a 5 s extended exposure of TDMASn to the substrates; (3) a 10 s purge of oversupplied TDMASn and any by-products; (4) a 1 s supply of GL vapor; (5) a 5 s extended exposure of GL to the substrates; (6) a 30 s purge of unreacted GL and any by-products. Using this reaction sequence, the thickness of tincone

deposited on N-CNTs was controlled by varying the number of MLD cycles. Si wafers, stainless steel (SS) current collectors, and nitrogen-doped carbon nanotubes (N-CNTs) were used as the substrates for tincone deposition. Si wafers and SS were used as received. Nitrogen-doped carbon nanotube (N-CNTs) were synthesized by using a chemical vapor deposition method and using iron (III) nitrate nanohydrate as the catalyst, and the synthesis process was detailed elsewhere [2]. N-CNTs powders were first dispersed in alcohol using an ultrasonic bath and then evenly dripped on an aluminum (Al) foil. After being dried at room temperature, the N-CNTs coated Al foil was cut into pieces and put into the ALD chamber for tincone deposition. After the deposition, tincone/N-CNTs were carefully scraped off the aluminum foil for structural and electrochemical characterizations.

#### *Material characterizations*

The thickness of tincone on the Si substrate was obtained by taking an average of five measured data points on a Profilometer. Microstructure of tincone/N-CNTs was characterized using a high-resolution transmission electron microscope (FEI F30). Sn L<sub>3</sub>-edge X-ray absorption near edge structures (XANES) measurements was performed at the Soft X-ray Micro-characterization Beamline (SXRMB) of Canadian Light Source (CLS), and data were recorded using surface-sensitive total electron yield (TEY) mode with a probing depth of 1–10 nm. XANES measurements at the C K-edge and the O K-edge were performed at the spherical grating monochromator (SGM) beamline of CLS in a vacuum chamber at 10<sup>-8</sup> torr, and data were recorded using the TEY mode. XANES spectra were first normalized by incident photon flux  $I_0$  and then normalized to the edge jump of unity using Athena software. Tincone deposited on silicon wafers were used for XAFS test. Commercial SnO<sub>2</sub>, SnO, and Sn (VWR) were used for comparison with tincone.

#### *Electrochemical measurement*

Electrochemical evaluation of tincone deposited on SS and N-CNTs substrates was carried out

in coin cells (CR2032) using lithium metal foils as the counter electrode. Tincone/SS was directly used as the electrode. To prepare the tincone/N-CNTs electrode, tincone/N-CNTs powders, Super P (TIMCAL) and carboxymethyl cellulose (CMC, 5wt% aqueous solution, TIMCAL) with a weight ratio of 7:2:1 were mixed thoroughly in an agate mortar to form an uniform slurry. The slurry was then cast on a copper foil and dried at 60°C in a vacuum oven overnight. The dried electrode was cut into round shapes with a diameter of 1.27 cm. The electrolyte was 1.3M LiPF<sub>6</sub> in ethylene carbonate (EC)/diethylene carbonate (DEC) (3:7 v/v). The cycling performance of the assembled coin cells was evaluated in a voltage range of 0.01-3.0 V on a Neware BTS 4000 battery tester. Cyclic voltammetry (CV) was measured at a sweep rate of 0.2 mV s<sup>-1</sup> on a Biologic VSP electrochemical workstation. Electrochemical impedance spectroscopy (EIS) was measured over a frequency range of 100 kHz to 0.01 Hz.



**Table SI-1.** Summary of deposition condition, post-annealing, and electrochemical activity towards to Li storage for MLD films.

| MLD Film<br>(role in LIBs) | Metal<br>precursor | Organic<br>reactant | Deposition<br>T (°C) | Growth per<br>cycle (Å) | Post annealing | Film<br>crystallinity              | Electrochemical activity<br>towards Li storage                                     | Ref    |
|----------------------------|--------------------|---------------------|----------------------|-------------------------|----------------|------------------------------------|------------------------------------------------------------------------------------|--------|
| LTP (anode)                | Li(thd)            | TPA                 | 200–240              | 3.0                     | As-deposited   | Crystalline                        | ~ 10 $\mu\text{Ah cm}^{-2}$ at 0.05C                                               | [3]    |
| Titanicone<br>(anode)      | TDMAT              | GL                  | 80-160               | 0.9-0.2                 | As-deposited   | Amorphous                          | No                                                                                 | [4]    |
|                            |                    |                     |                      |                         | Air, 500°C     | Anatase $\text{TiO}_2$             | ~ 0.5 $\mu\text{Ah cm}^{-2}$ at 1 $\mu\text{A}$                                    |        |
|                            |                    |                     |                      |                         | He, 500°C      | Amorphous                          | ~ 0.6 $\mu\text{Ah cm}^{-2}$ at 1 $\mu\text{A}$                                    |        |
| Vanadicone<br>(cathode)    | TEMAV              | GL                  | 80-180               | 1.2-1.5                 | As-deposited   | Amorphous                          | No                                                                                 | [5]    |
|                            |                    |                     |                      |                         | Air, 500°C     | Crystalline $\text{V}_2\text{O}_5$ | ~1.0 $\mu\text{Ah cm}^{-2}$ at 1C                                                  |        |
|                            |                    |                     |                      |                         | He, 500°C      | Amorphous                          | ~1.2 $\mu\text{Ah cm}^{-2}$ at 1C                                                  |        |
| Tincone (anode)            | TDMA <sub>Sn</sub> | GL                  | 100                  | 2.5                     | As-deposited   | Amorphous                          | 450 mAh g <sup>-1</sup> for<br>tincone/N-CNTs<br>composite at 0.1 Ag <sup>-1</sup> | Herein |

Lithium terephthalate – LTP; Benzene-1,4-dicarboxylic acid – TPA; Tetrakisdimethylaminotitanium – TDMAT; Glycerol – GL; Tetrakisethylmethylaminovanadium – TEMAV; Temperature – T; Benzene-1,4-dicarboxylic acid – TPA; Tetrakis(dimethylamino)tin (IV) – TDMA<sub>Sn</sub>.

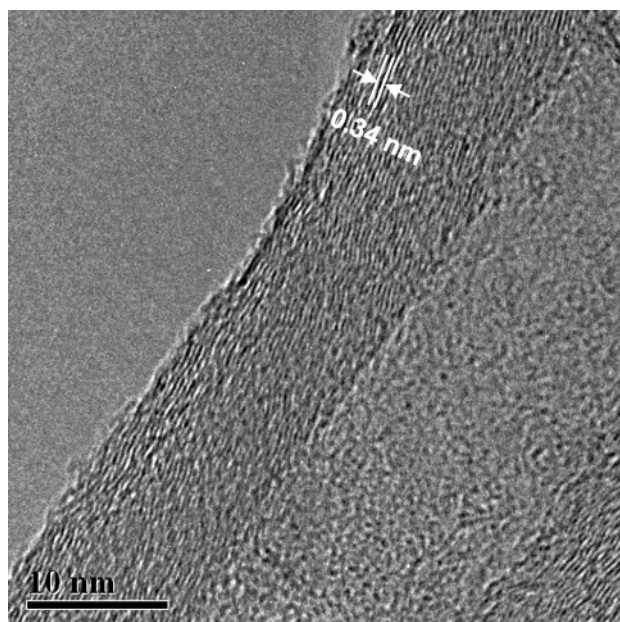

**Figure SI-1.** HRTEM image of N-CNTs.

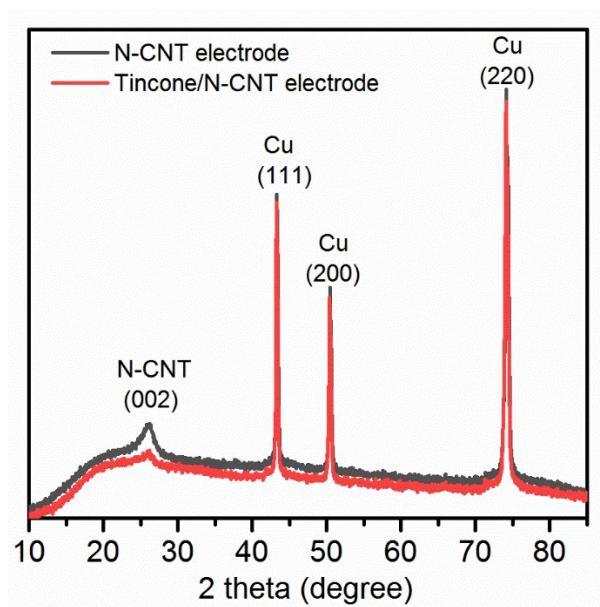

**Figure SI-2.** XRD patterns of N-CNTs and tincone/N-CNTs electrodes on the Cu current collector.

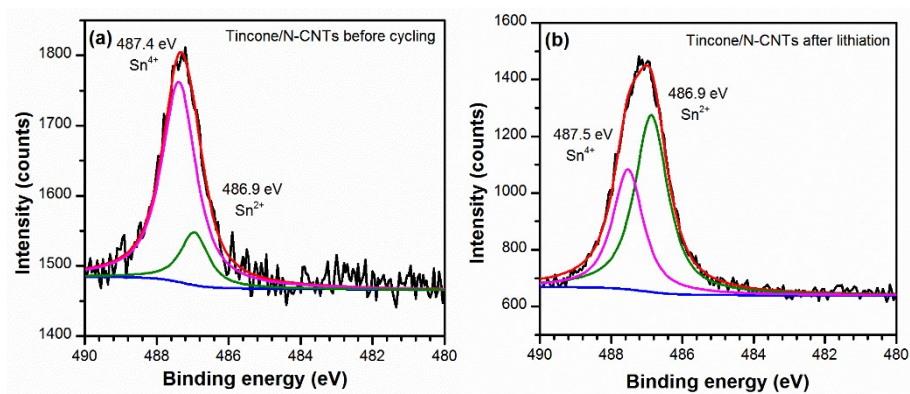

**Figure SI-3.** XPS spectra at the Sn 3d<sub>5/2</sub> peak for tincone/N-CNTs (a) before cycling and (b) after lithiation (discharge).

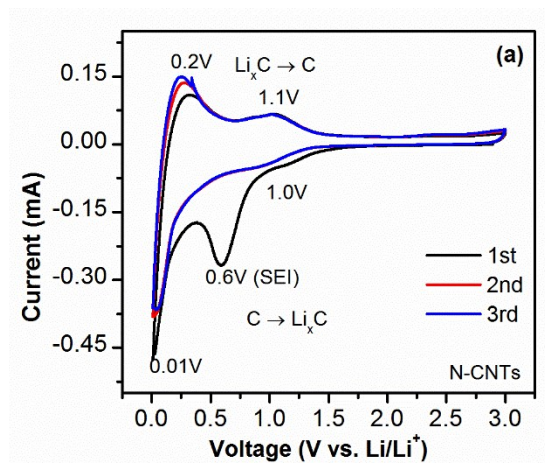

**Figure SI-4.** CV curves of N-CNTs measured at 0.1 mV s<sup>-1</sup> in the first three cycles.

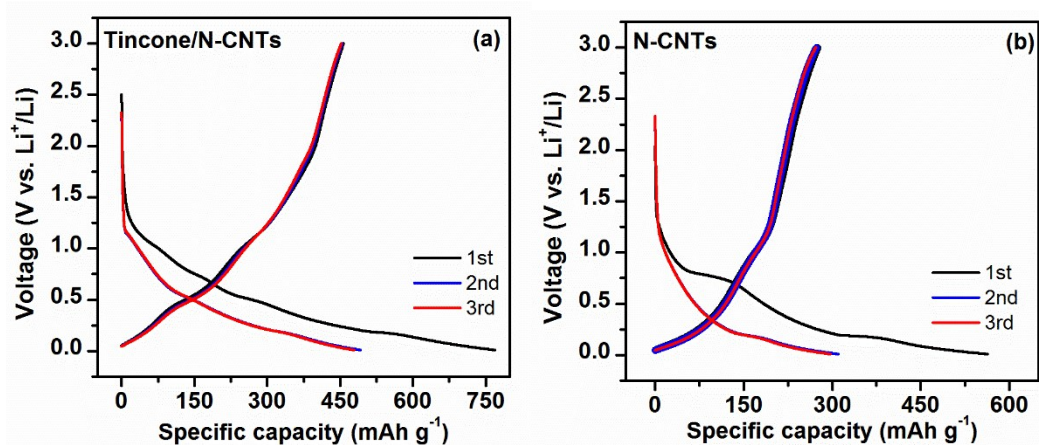

**Figure SI-5.** Charge-discharge curves of (a) tincone/N-CNTs and (b) of N-CNTs measured at

0.1 A g<sup>-1</sup> in the first three cycles.

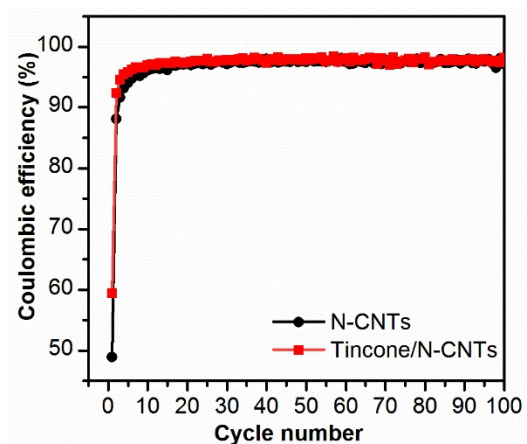

**Figure SI-6.** Coulombic efficiency (CE) of tincone/N-CNTs and N-CNTs.

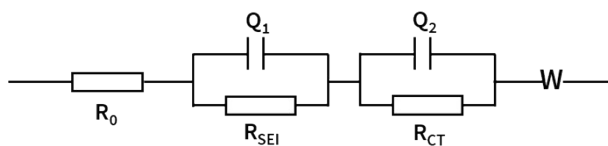

**Figure SI-7.** Equivalent circuit for fitting EIS data in Figure 4e.  $R_0$ : solution resistance;  $R_{SEI}$ : SEI resistance;  $R_{CT}$ : charge transfer resistance;  $W$ : Warburg impedance.

**Table SI-2.** Fitting result of EIS test for Tincone/N-CNTs electrode before and after 100 cycles.

|                  | $R_0 (\Omega)$ | $R_{SEI} (\Omega)$ | $R_{CT} (\Omega)$ |
|------------------|----------------|--------------------|-------------------|
| Before cycling   | 2.6            | 12.5               | 125.4             |
| After 100 cycles | 3.4            | 24.3               | 27.6              |

## References

- [1] K. Van de Kerckhove, J. Dendooven, C. Detavernier. Annealing of thin “Tincone” films, a tin-based hybrid material deposited by molecular layer deposition, in reducing, inert, and oxidizing atmospheres. *J. Vac. Sci. Technol.* 2018, A 36(5), 051506.
- [2] M. Arjmand, K. Chizari, B. Krause, P. Pötschke, U. Sundararaja. Effect of synthesis catalyst on structure of nitrogen-doped carbon nanotubes and electrical conductivity and electromagnetic interference shielding of their polymeric nanocomposites. *Carbon*, 2016, 98, 358-372.
- [3] M. Nisula, M. Karppinen, Atomic/Molecular Layer Deposition of Lithium Terephthalate Thin Films as High Rate Capability Li-Ion Battery Anodes. *Nano Lett*, 2016, 16, 1276-1281.
- [4] K. Van de Kerckhove, F. Mattelaer, D. Deduytsche, P. M. Vereecken, J. Dendooven, C. Detavernier. Molecular layer deposition of "titanicone", a titanium-based hybrid material, as an electrode for lithium-ion batteries. *Dalton Trans.*, 2016, 45, 1176-1184.
- [5] K. Van de Kerckhove, F. Mattelaer, J. Dendooven, C. Detavernier. Molecular layer deposition of "vanadicone", a vanadium-based hybrid material, as an electrode for lithium-ion batteries. *Dalton Trans.*, 2017, 46, 4542-4553.
